# Supplementary material
Source: PubMed Central journal article supplement (PMC3692282)
Supplement: NIHMS466109-supplement-Suppl__Table.pdf [file NIHMS466109-supplement-Suppl__Table.pdf]

Supplementary Table

*Characteristics of Treatment Received by Depressed and Non-Depressed Patients Assigned to CALM*

|                                    | MDD (n = 312) | No MDD (n = 170) | <i>p</i> value  |
|------------------------------------|---------------|------------------|-----------------|
| Modalities Received                |               |                  |                 |
| CBT Only                           | 108 (34.6%)   | 58 (34.1%)       | .100, <i>ns</i> |
| MM Only                            | 34 (10.9%)    | 9 (5.3%)         |                 |
| CBT + MM                           | 170 (54.5%)   | 103 (60.6%)      |                 |
| In-person visits with ACS          | 8.69 (4.70)   | 9.28 (4.32)      | .178, <i>ns</i> |
| Phone visits with ACS              | 4.33 (4.45)   | 4.04 (3.50)      | .419, <i>ns</i> |
| CBT visits with ACS                | 6.69 (4.20)   | 7.64 (3.83)      | .013*           |
| MM visits with ACS                 | 6.54 (5.36)   | 5.86 (3.88)      | .109, <i>ns</i> |
| Active treatment visits with ACS   | 9.34 (5.11)   | 9.12 (4.10)      | .603, <i>ns</i> |
| Relapse prevention visits with ACS | 3.72 (3.49)   | 4.18 (3.45)      | .162, <i>ns</i> |

CALM = Coordinated Anxiety Learning and Management; MDD = Major Depressive Disorder; CBT = Cognitive-Behavioral Therapy, MM = Medication Management, ACS = Anxiety Clinical Specialist

\*Note that this does not meet this study's *a priori* threshold for statistical significance ( $p < .01$ ).
